# Supplementary material
Source: PubMed Central journal article supplement (PMC4787845)
Supplement: smit717967.ww1_default.pdf [file smit717967.ww1_default.pdf]

**Appendix: Search Strategy [posted as supplied by author]**

1. Orthopedic\$
2. orthopaedic\$.tw.
3. 1 OR 2
4. surg\$.tw.
5. exp Surgical Procedures, Operative/
6. operat\$.tw.
7. 4 OR 5 OR 6
8. 3 AND 7
9. wound closure.tw.
10. skin closure.tw.
11. 9 OR 10
12. exp sutures
13. staple\$.tw.
14. 12 AND 13
15. 11 AND 14
16. 8 AND 15
17. limit 16 to humans
